# Supplementary material
Source: MDPI journal article supplement (https://www.mdpi.com/2076-3263/12/6/227)
Supplement: s1 [file s1]

Article

# Structural Complexity and Seismogenesis: The Role of the Transpressive Structures in the 1976 Friuli Earthquakes (Eastern Southern Alps, NE Italy)

Giulia Patricelli <sup>1,\*</sup>, Maria Eliana Poli <sup>1</sup> and Daniele Cheloni <sup>2</sup>

<sup>1</sup> Dipartimento di Scienze AgroAlimentari, Ambientali e Animali, Università degli Studi di Udine, 33100 Udine, Italy; eliana.poli@uniud.it

<sup>2</sup> Osservatorio Nazionale Terremoti, Istituto Nazionale di Geofisica e Vulcanologia, 00143 Rome, Italy; danielle.cheloni@ingv.it

\* Correspondence: [giulia.patricelli@uniud.it](mailto:giulia.patricelli@uniud.it)

## Supplementary Material – S1 1

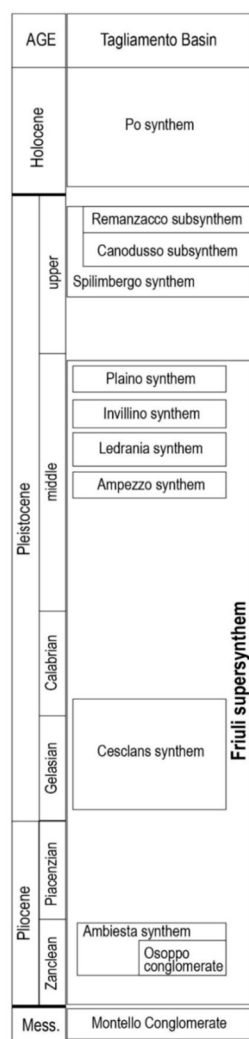

**Figure S1.** Chronostratigraphical correlation scheme of the Plio-Quaternary Units of the Tagliamento basin (modified after [27]).
