# Supplementary material
Source: MDPI journal article supplement (https://www.mdpi.com/2076-3263/12/6/227)
Supplement: s1 [file s1]

Article

# Structural Complexity and Seismogenesis: The Role of the Transpressive Structures in the 1976 Friuli Earthquakes (Eastern Southern Alps, NE Italy)

Giulia Patricelli <sup>1,\*</sup>, Maria Eliana Poli <sup>1</sup> and Daniele Cheloni <sup>2</sup>

<sup>1</sup> Dipartimento di Scienze AgroAlimentari, Ambientali e Animali, Università degli Studi di Udine, 33100 Udine, Italy; eliana.poli@uniud.it

<sup>2</sup> Osservatorio Nazionale Terremoti, Istituto Nazionale di Geofisica e Vulcanologia, 00143 Rome, Italy; daniele.cheloni@ingv.it

\* Correspondence: [giulia.patricelli@uniud.it](mailto:giulia.patricelli@uniud.it)

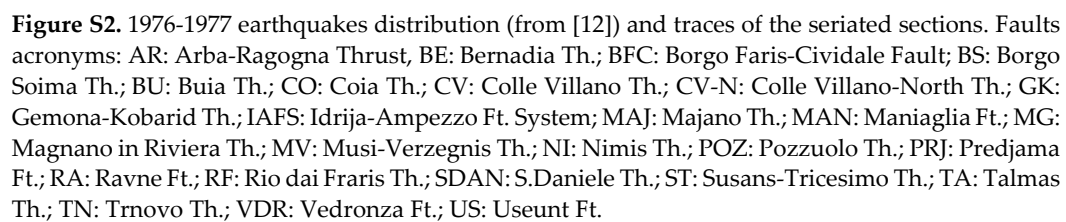

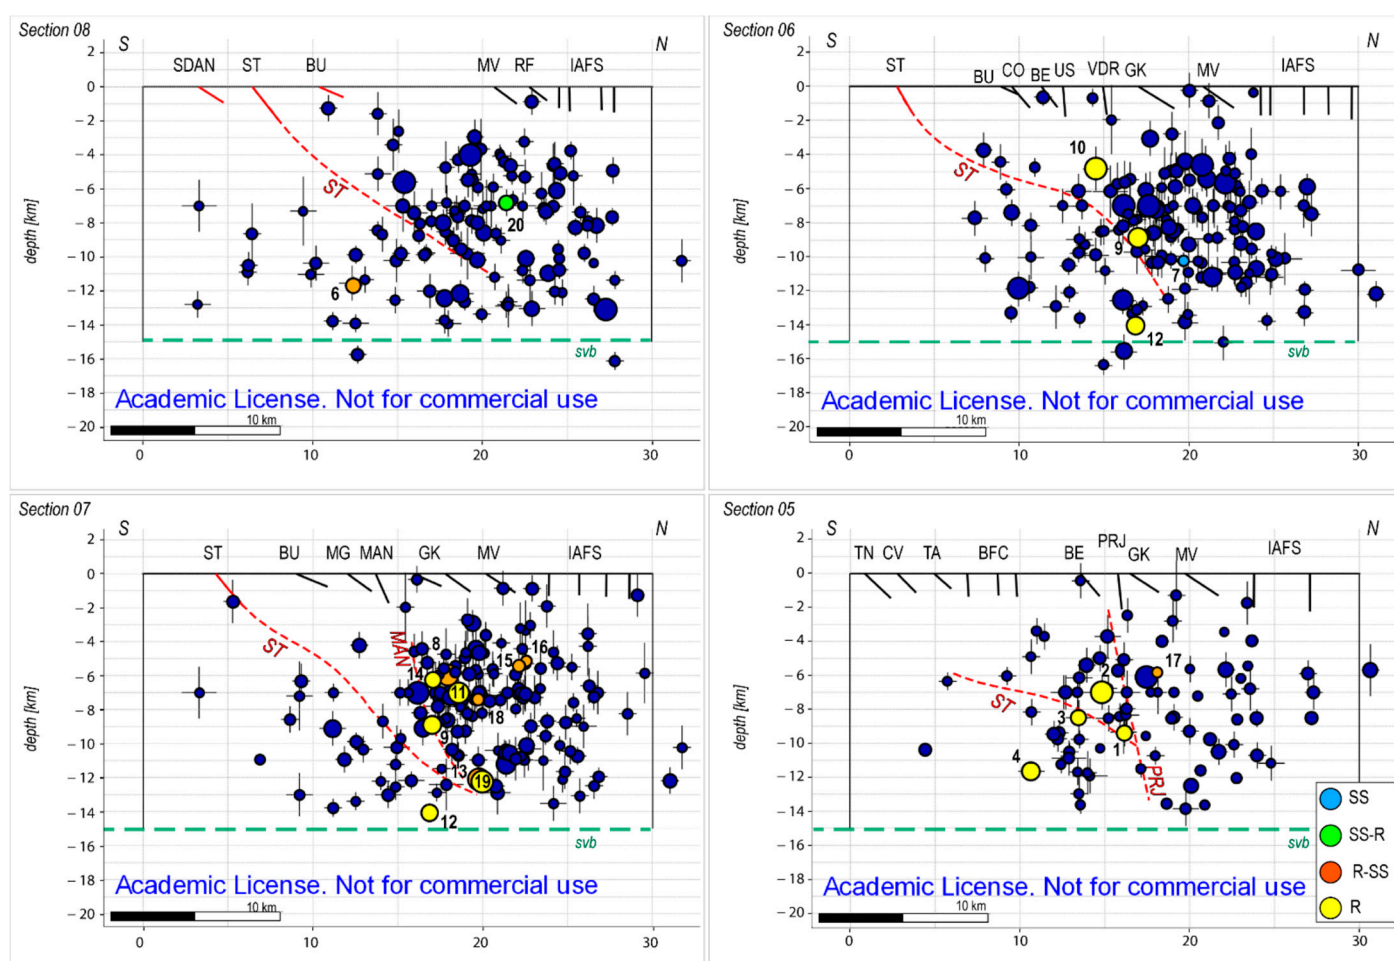

**Figure S3.** 1976-1977  $M_I \geq 2.5$  seismicity plotted on the N-S oriented seriated sections 05,06,07,08 (see traces in S2-Fig. S2) together with the active faults surfaces reconstructed in this study (red thrusts) and tectonic structures known from the literature (black faults [27]). The symbols size is proportional to the magnitude value ( $M_I$ ), the number of the events refers to Table 2 of the main text, while the color refers to the kinematics as shown in the legend. The vertical and horizontal bars for each event represent the vertical (Z) and horizontal (H) error localization, respectively. The red dashed lines refer to the intersection of the faults surfaces interpolated from sections 01, 02, 03,04. The green dashed line represents the base of the seismogenic volume (svb). Faults acronyms: BE: Bernadia Thrust; BFC: Borgo Faris – Cividale Fault-System; BU: Buia Th.; CO: Coia Th.; CV: Colle Villano Th.; GK: Gemona-Kobarid Th.; IAFS: Idrija-Ampezzo Ft. System; MG: Magnano in Riviera Th.; MV: Musi-Verzegnis Th.; PRJ: Predjama Ft.; RF: Rio dai Fraris Th.; SDAN: S.Daniele Th.; ST: Susans-Tricesimo Th.; TA: Talmas Th.; TN: Trnovo Th.; VDR: Vedronza Fault; US: Useunt Ft.
