# Supplementary material
Source: MDPI journal article supplement (https://www.mdpi.com/2076-3263/12/6/227)
Supplement: s1 [file s1]

## Article

# Structural Complexity and Seismogenesis: The Role of the Transpressive Structures in the 1976 Friuli Earthquakes (Eastern Southern Alps, NE Italy)

Giulia Patricelli <sup>1,\*</sup>, Maria Eliana Poli <sup>1</sup> and Daniele Cheloni <sup>2</sup>

<sup>1</sup> Dipartimento di Scienze AgroAlimentari, Ambientali e Animali, Università degli Studi di Udine, 33100 Udine, Italy; eliana.poli@uniud.it

<sup>2</sup> Osservatorio Nazionale Terremoti, Istituto Nazionale di Geofisica e Vulcanologia, 00143 Rome, Italy; daniele.cheloni@ingv.it

\* Correspondence: [giulia.patricelli@uniud.it](mailto:giulia.patricelli@uniud.it)

## Supplementary Material – S3

### Coulomb stress changes

Our depicted seismotectonic framework of the central-eastern Friuli area suggests that the  $M_L$  6.4 mainshock of May 1976 rupturing the southeastern portion (ST-SE) of the Susans-Tricesimo Thrust (ST), was likely triggered by  $M_L$  4.5 foreshock occurred on the transpressive Predjama Fault (PRJ).

To investigate this hypothesis, we calculated the static Coulomb stress changes on the ST-SE fault plane (strike/dip/rake =  $123^\circ/30^\circ/118^\circ$ ), that is the plane associated with the  $M_L$  6.4 mainshock (May 6, 1976, hrs 20:00) induced by the previous  $M_L$  4.5 foreshock occurred few minutes before.

In particular, we model the Coulomb stress using as the causative fault of the  $M_L$  4.5 event, the rupture geometry of the Predjama Fault (strike/dip/rake =  $135^\circ/78^\circ/130^\circ$ ) and the empirical relation of [106] are used to compute rupture parameters of the  $M_L$  4.5 foreshock, assuming a constant slip distribution on few fault patches of the PRJ fault plane, equivalent to a  $M_w$  4.6 seismic event. We tested different depth distribution of the assumed fault slip of the  $M_L$  4.5 foreshock, as its exact slip distribution is not known. We tested also two values of the effective friction coefficient, that is assuming a value of 0.4, as is commonly used in stress interaction studies and a value of 0.8, as is assumed for continental thrust faults [107].

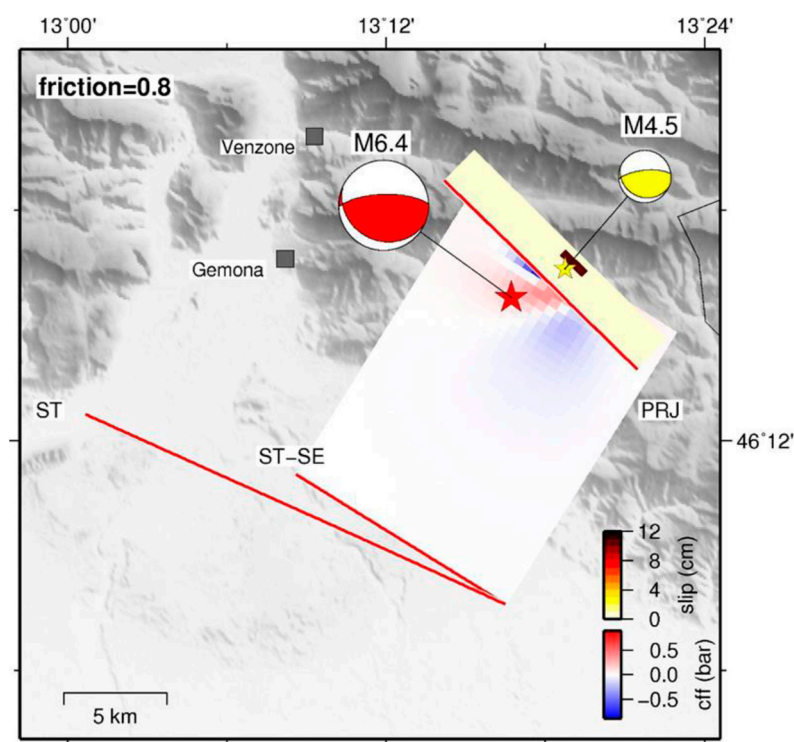

**Figure S4.** Change of Coulomb stress on the ST-SE fault plane before the occurrence of the May 6, 1976 main event M6.4 resolved on the fault plane (friction coefficient = 0.8). The red star is the M<sub>L</sub> 6.4 mainshock of the 1976-1077 Friuli seismic sequence; the yellow star represents the M<sub>L</sub> 4.5 foreshock. Solid red lines represent the surface trace of the modelled fault planes (ST-SE = southeastern Susan-Tricesimo, PRJ = Predjama). The coloured fault patches on the PRJ fault plane indicate the assumed slip (between 6-8 km depth) during the foreshock.

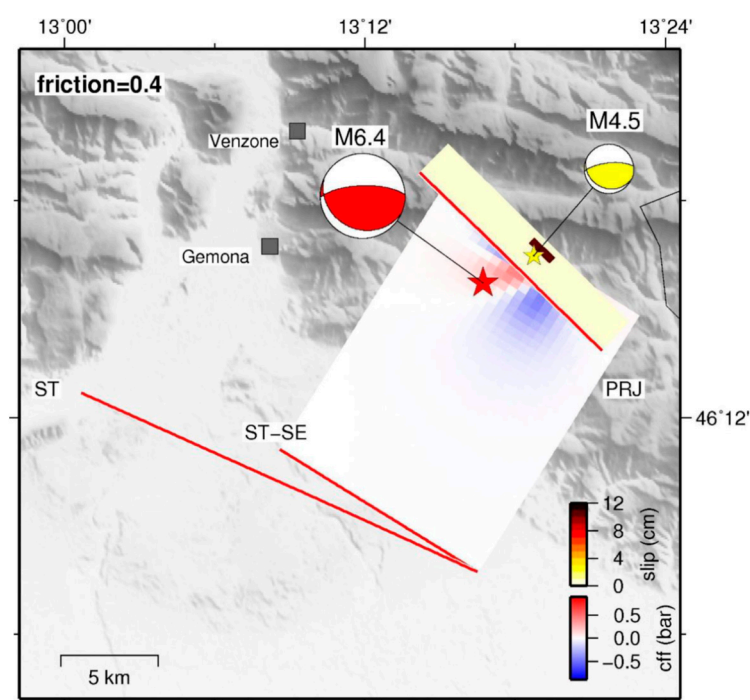

**Figure S5.** Change of Coulomb stress on the ST-SE fault plane before the occurrence of the May 6, 1976 main event M6.4 resolved on the fault plane (friction coefficient = 0.4). The red star is the M<sub>L</sub> 6.4 mainshock of the 1976-1077 Friuli seismic sequence; the yellow star represents the M<sub>L</sub> 4.5 foreshock. Solid red lines represent the surface trace of the modelled fault planes (ST-SE = southeastern Susan-Tricesimo, PRJ = Predjama). The coloured fault patches on the PRJ fault plane indicate the assumed slip (between 6-8 km depth) during the foreshock.

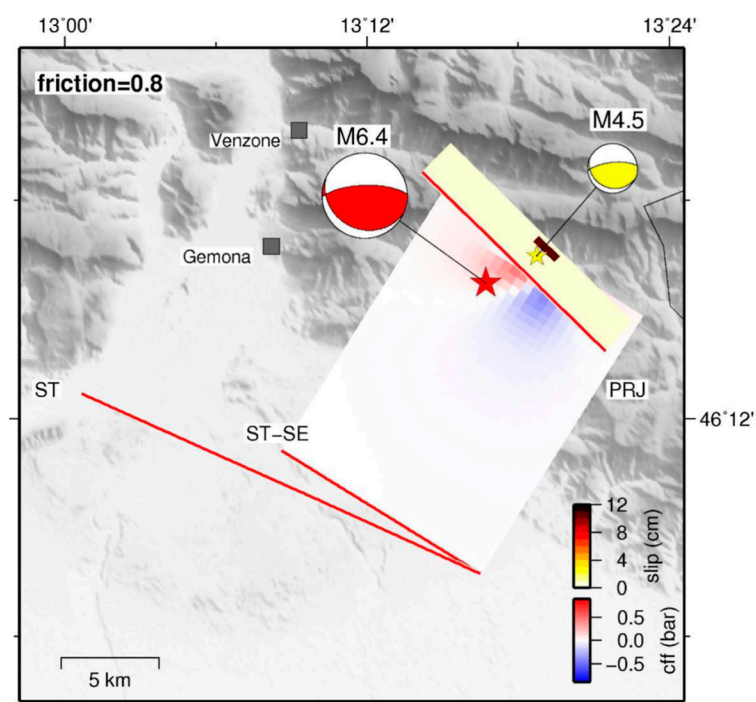

**Figure S6.** Change of Coulomb stress on the ST-SE fault plane before the occurrence of the May 6, 1976 main event M6.4 resolved on the fault plane (friction coefficient = 0.8). The red star is the M<sub>L</sub> 6.4 mainshock of the 1976-1077 Friuli seismic sequence; the yellow star represents the M<sub>L</sub> 4.5 foreshock. Solid red lines represent the surface trace of the modelled fault planes (ST-SE = southeastern Susan-Tricesimo, PRJ = Predjama). The coloured fault patches on the PRJ fault plane indicate the assumed slip (between 7-9 km depth) during the foreshock.

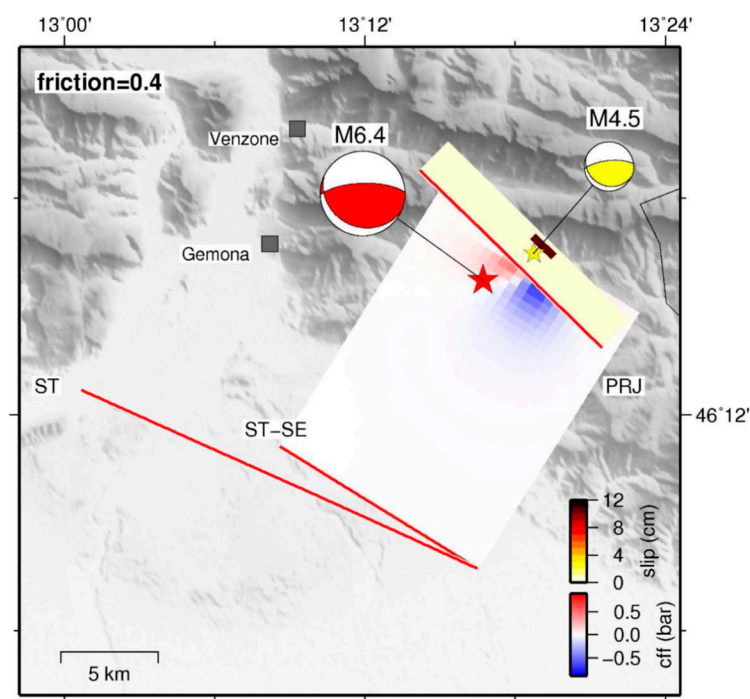

**Figure S7.** Change of Coulomb stress on the ST-SE fault plane before the occurrence of the May 6, 1976 main event M6.4 resolved on the fault plane (friction coefficient = 0.4). The red star is the M<sub>L</sub> 6.4 mainshock of the 1976-1077 Friuli seismic sequence; the yellow star represents the M<sub>L</sub> 4.5 foreshock. Solid red lines represent the surface trace of the modelled fault planes (ST-SE = southeastern Susan-Tricesimo, PRJ = Predjama). The coloured fault patches on the PRJ fault plane indicate the assumed slip (between 7-9 km depth) during the foreshock.
